# Supplementary material
Source: PubMed Central journal article supplement (PMC3508329)
Supplement: NIHMS398701-supplement-13415_2012_106_MOESM1_ESM.pdf [file NIHMS398701-supplement-13415_2012_106_MOESM1_ESM.pdf]

### **Table Legends**

**Table S1.** Prime Discrimination Accuracy. Mean percent errors (%) and standard deviations (SD) by prime category and prime location in Experiment 1.

**Table S2.** Prime Discrimination Accuracy. Mean percent errors (%) and standard deviations (SD) by prime category and prime location in Experiment 2.

**Table S3.** Items used in Experiments 1 and 2. \* items not used in Control Experiment 2.

**Table S4.** Items used in Control Experiment 1. \* items used in the practice phase.

**Table S1**

|                    | <b>Prime Category</b> |     |               |     |
|--------------------|-----------------------|-----|---------------|-----|
|                    | Tool Primes           |     | Animal Primes |     |
|                    | %                     | SD  | %             | SD  |
| Prime on the Left  | .36                   | .18 | .28           | .16 |
| Prime on the Right | .32                   | .18 | .29           | .13 |

**Table S2**

| Prime Location | %    |        | SD   |        |
|----------------|------|--------|------|--------|
|                | Tool | Animal | Tool | Animal |
| 1              | .31  | .22    | .12  | .13    |
| 2              | .32  | .31    | .17  | .18    |
| 3              | .24  | .28    | .11  | .16    |
| 4              | .28  | .29    | .14  | .15    |
| 5              | .32  | .24    | .12  | .14    |
| 6              | .33  | .19    | .15  | .12    |
| 7              | .29  | .17    | .19  | .12    |
| 8              | .33  | .23    | .14  | .13    |

**Table S3**

| Tools           | Animals      |
|-----------------|--------------|
| axe             | bear         |
| baseball bat    | bee*         |
| bell*           | beetle       |
| butcher knife   | bird         |
| butterfly net   | butterfly    |
| clothespin      | cat          |
| corkscrew       | chicken      |
| crayon          | cow          |
| cup             | crab         |
| exacto-knife    | deer         |
| feather duster* | duck         |
| flyswatter      | eagle        |
| fork            | fly          |
| gavel           | frog         |
| glass           | goldfish     |
| hair brush      | gorilla      |
| hammer          | hippopotamus |
| hole puncher    | horse        |
| iron            | lobster*     |
| meat tenderizer | monkey       |
| nail file       | mouse        |
| paint roller    | rabbit       |
| pliers          | sheep        |
| racket          | skunk        |
| saw             | snail        |
| scissors        | snake        |
| screwdriver     | spider       |
| spray bottle    | squirrel     |
| tweezers        | tiger        |
| water gun       | turtle       |

**Table S4**

| Tools       | Animals  | Faces                  | Places                  |
|-------------|----------|------------------------|-------------------------|
| blow drier* | bear     | George W. Bush         | Big Ben*                |
| chisel      | cow      | Bill Clinton           | Stonehenge              |
| cup         | deer     | Princess Diana         | The Arch                |
| fork        | elephant | Albert Einstein        | The Coliseum            |
| hairbrush   | gorilla  | John F. Kennedy        | The Eiffel Tower        |
| hammer      | horse    | Martin Luther King Jr. | The Golden Gate Bridge  |
| knife       | monkey   | Madonna                | The Grand Canyon        |
| nail file   | rabbit*  | Barack Obama           | The Great Wall Of China |
| pliers      | sheep    | Elvis Presley          | The Hoover Dam          |
| racket      | skunk    | Sylvester Stallone*    | The Pyramids            |
| razor       | tiger    | Mother Theresa         | The Taj Mahal           |
| scissors    | whale    | Oprah Winfrey          | The Washington Monument |
| screwdriver | wolf     | Tiger Woods            | The White House         |

**Figure S1**

Go/No-Go response times by Location and Category

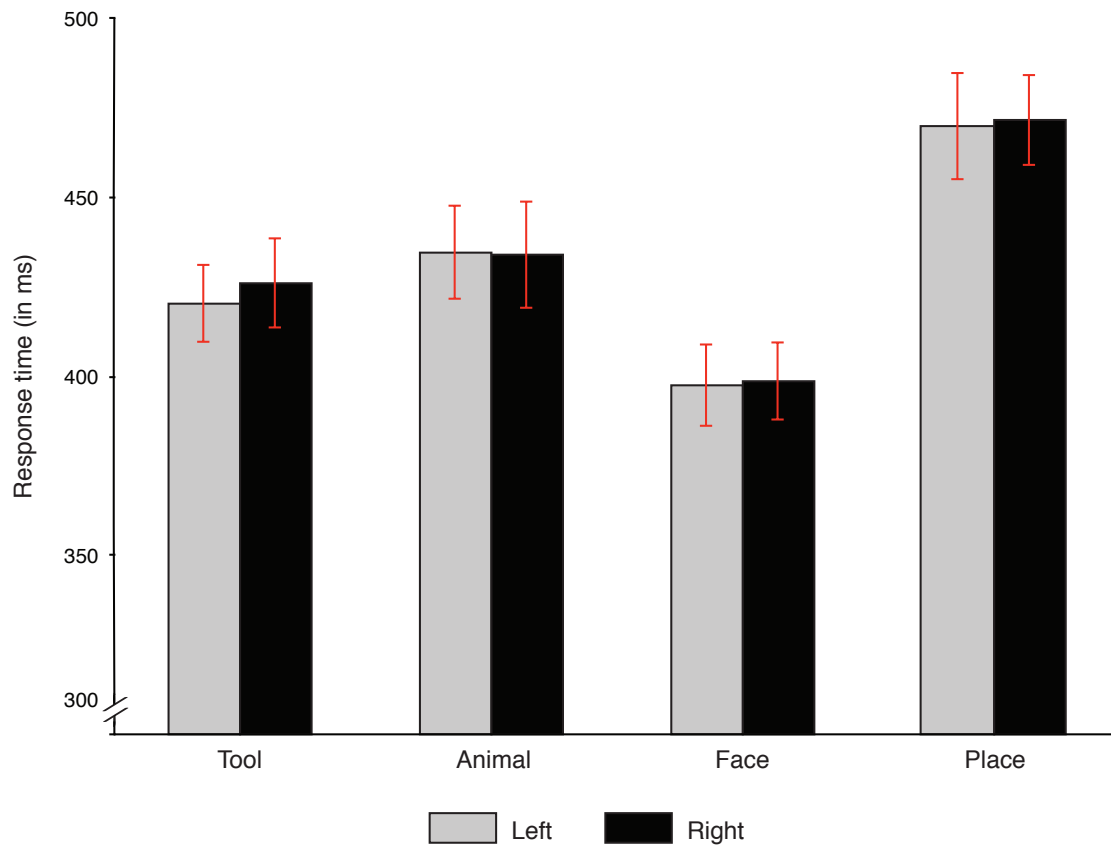

**Figure S1.** Response times from Control Experiment 1 displayed as a function of location and category. Error bars reflect standard error of the mean across participants.
